# Supplementary material for: Community differentiation of bacterioplankton in the epipelagic layer in the South China Sea
Source: PubMed Central journal article supplement (PMC5980402; doi:10.1002/ece3.4064), 2018-04-19

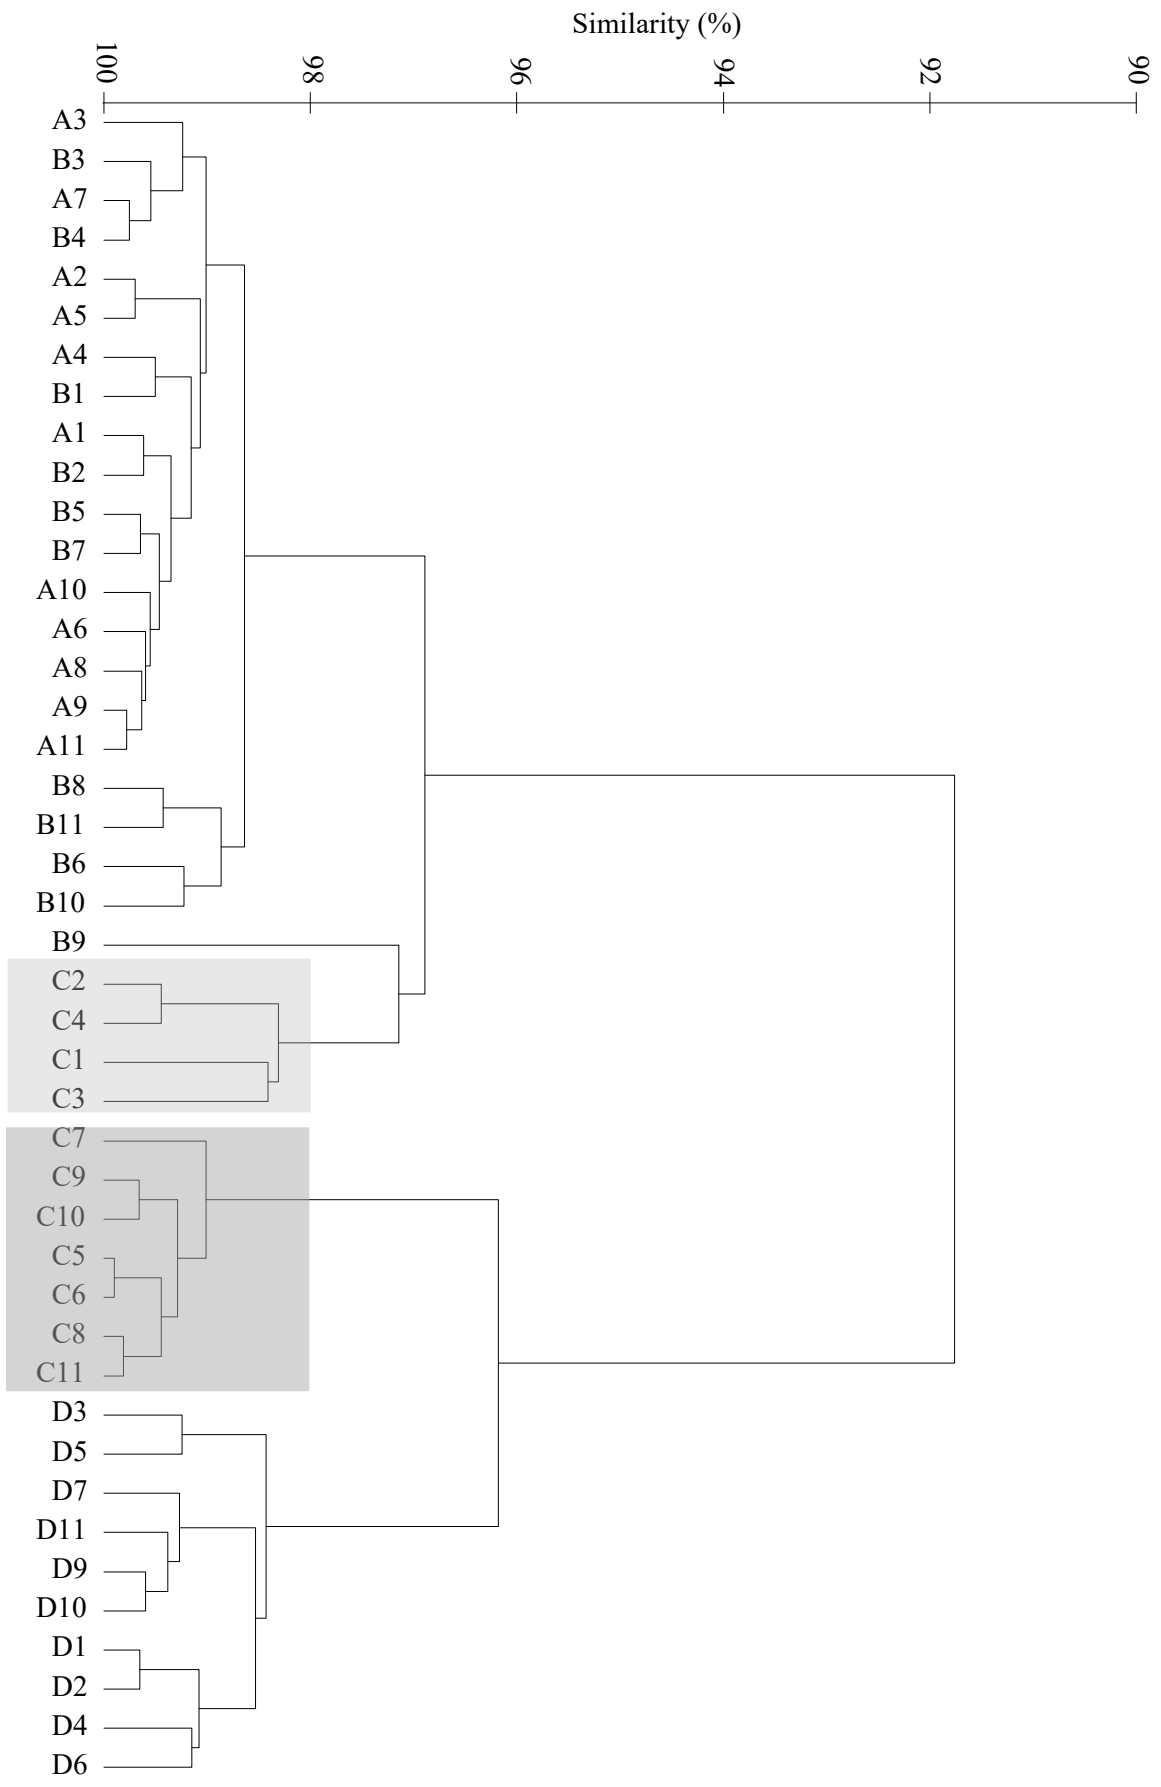

Supplement: ECE3-8-4932-s002.pdf [file ECE3-8-4932-s002.pdf]
